# Supplementary material for: Autoregulatory control of microtubule binding in doublecortin-like kinase 1
Source: eLife journal article supplement (doi:10.7554/elife.60126), 2021-07-23

Figure 5-source data

B

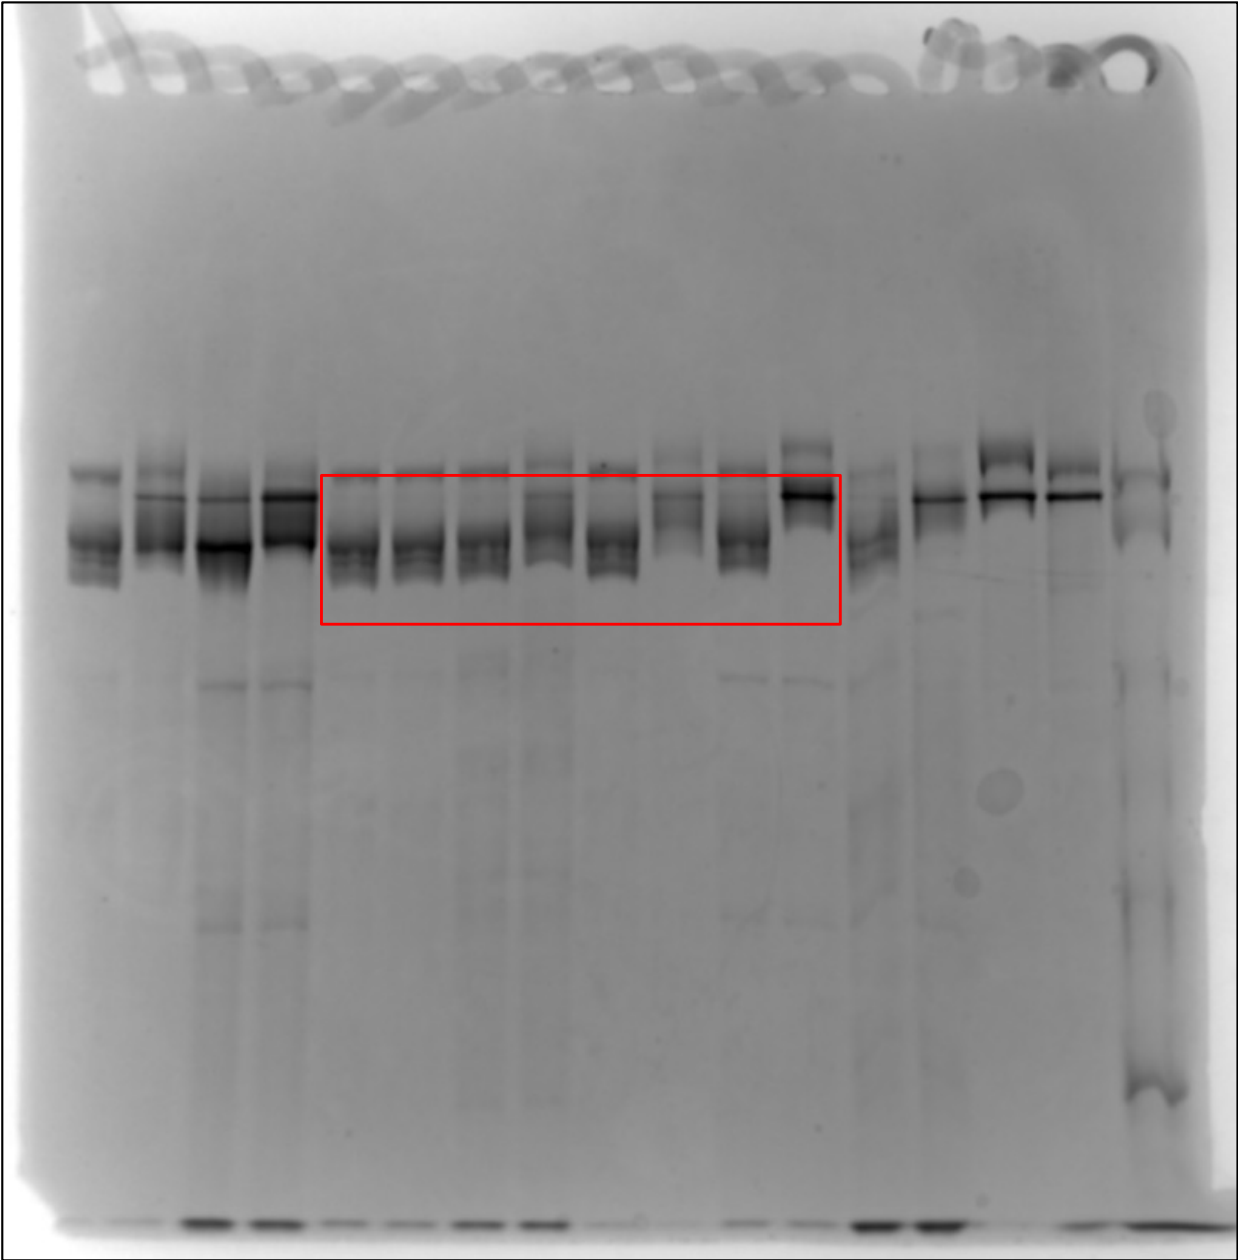

G

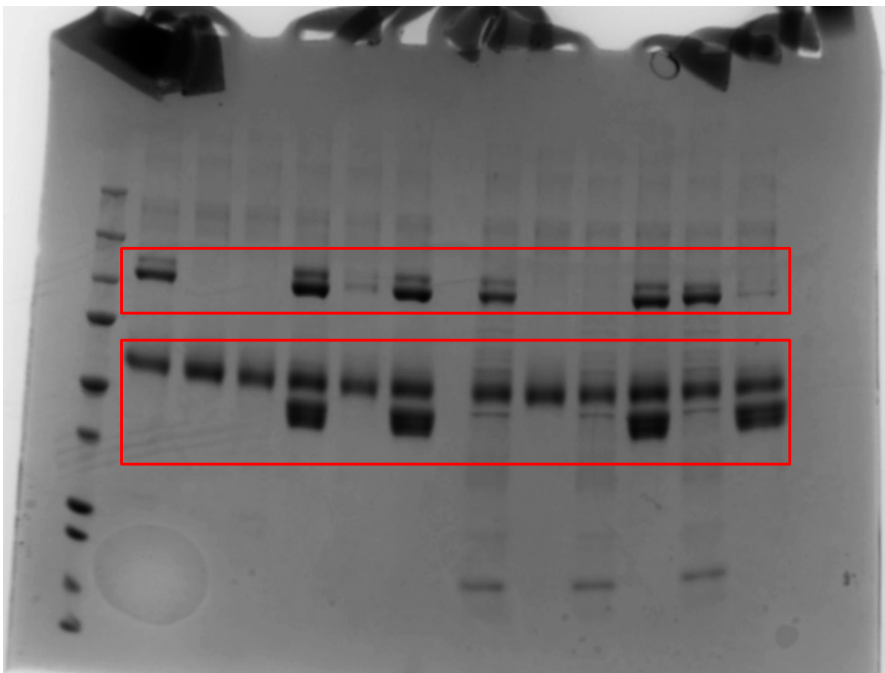

Supplement: fig5-data1 [file elife-60126-fig5-data1-v2.pdf]
